# Supplementary material for: Transcriptome Sequencing Highlights the Regulatory Role of DNA Methylation in Immune-Related Genes’ Expression of Chinese Oak Silkworm, Antheraea pernyi
Source: MDPI journal article supplement (doi:10.3390/insects13030296), 2022-03-17
Supplement: s1 [file s1]

**Table S1.** Gene specific Primers used for qRT-PCR analysis.

| Gene ID         | Gene name                                             | Forward/reverse | Primer sequence (5'-3')   |
|-----------------|-------------------------------------------------------|-----------------|---------------------------|
| c89459.graph_c0 | Mitogen-activated protein kinase kinase kinase<br>4   | F               | GATGATCCGGTCGAAGTGT       |
|                 |                                                       | R               | CGGAAGGAGAGGTTAGTCGT<br>G |
| c92066.graph_c0 | Integrin beta pat-3-like                              | F               | GTCCAGGACAATTGCAGGAT      |
|                 |                                                       | R               | CGTGGCTGTCTTGTCTTTCA      |
| c90624.graph_c0 | GGBP                                                  | F               | TCGGTCGGCTCAGAGACTAT      |
|                 |                                                       | R               | GATACGTGGTGACTGCAGGA      |
| c91406.graph_c2 | Suppressor of cytokine signaling 2-like isoform<br>X2 | F               | AAAGGAGTCGGGTGTGTTTG      |
|                 |                                                       | R               | CGGCAGCTTTTTGTAACGAT      |
| c93759.graph_c1 | Peptidoglycan recognition protein-like protein        | F               | CGCCATCTTGGTTACGTTTT      |
|                 |                                                       | R               | CGGCAGCCATTTTGTATCA       |
| c93774.graph_c0 | Cactus                                                | F               | GACGTGAAGCTGGTGCAGTA      |
|                 |                                                       | R               | AGAGGCTTTCGCTTTCACTG      |
| c77163.graph_c1 | Spaetzle                                              | F               | TGTACCGTGAAACCACCAGA      |
|                 |                                                       | R               | GGCGGACCTTTTGAATGTAA      |
| c85165.graph_c0 | Cytochrome P450                                       | F               | GTTGGCCGTCGACAATAAAT      |
|                 |                                                       | R               | GGCTTGTATTCGGGAGATCA      |
| c89772.graph_c1 | Serine protease inhibitor 13 precursor                | F               | CGCTAAAAGCACACGCTACA      |
|                 |                                                       | R               | GGCTTCTGGTAACGTGCATT      |
| c85340.graph_c0 | Hemolymph proteinase 9                                | F               | ATCTGGTTCGTCGATTACGG      |
|                 |                                                       | R               | TATAGAGGCGCTGGAGCAGT      |
|                 | Ap18s rRNA                                            | F               | CGATCCGCCGACGTTACTAC<br>A |
|                 |                                                       | R               | GTCCGGGCGCTGGTGAGATT      |
|                 | DNMT1                                                 | F               | ACGACTACGCCGTTGGTAAG      |
|                 |                                                       | R               | TCATCAGCTTGTTCACAGC       |
|                 | DNMT2                                                 | F               | TGTGCATGGAATGAATCAGG      |
|                 |                                                       | R               | CGGATCATTTCATCGAGGT       |

**Table S2.** Summary Statistics of the *A. pernyi* Transcriptome Annotation.

| Annotated databases  | Annotated number | Percentage % | 300 ≤ length < 1000 | length ≥ 1000 |
|----------------------|------------------|--------------|---------------------|---------------|
| COG_Annotation       | 8187             | 29.92        | 4222                | 3965          |
| GO_Annotation        | 12562            | 45.91        | 6934                | 5628          |
| KEGG_Annotation      | 13351            | 48.79        | 7523                | 5828          |
| KOG_Annotation       | 17920            | 65.49        | 10046               | 7874          |
| Pfam_Annotation      | 19325            | 70.62        | 10409               | 8916          |
| Swissprot_Annotation | 14013            | 51.21        | 7045                | 6968          |
| eggNOG_Annotation    | 25402            | 92.84        | 15144               | 10258         |
| nr_Annotation        | 23492            | 85.85        | 12893               | 10599         |
| All_Annotated        | 27361            | 100          | 16565               | 10796         |

**Table S3.** Table of GO Enrichment of All Genes and DEGs.

| Term Type          | Subcategories           | All Genes | DEGs |
|--------------------|-------------------------|-----------|------|
| Biological Process | Cellular process        | 6469      | 126  |
|                    | Metabolic process       | 6261      | 137  |
|                    | Single-organism process | 4371      | 122  |
|                    | Biological regulation   | 1828      | 33   |
|                    | Localization            | 1566      | 53   |

|                                                    |      |     |
|----------------------------------------------------|------|-----|
| Response to stimulus                               | 1142 | 30  |
| Cellular component organization or biogenesis      | 1099 | 8   |
| Signaling                                          | 770  | 13  |
| Multicellular organismal process                   | 307  | 4   |
| Developmental process                              | 304  | 2   |
| Multi-organism process                             | 96   | 8   |
| Reproduction                                       | 88   | 0   |
| Biological adhesion                                | 84   | 1   |
| Reproductive process                               | 74   | 0   |
| Locomotion                                         | 69   | 0   |
| Immune system process                              | 62   | 9   |
| Growth                                             | 29   | 0   |
| Behavior                                           | 26   | 0   |
| Rhythmic process                                   | 3    | 0   |
| Cell killing                                       | 1    | 1   |
| <b>Cellular Component</b>                          |      |     |
| Cell                                               | 4692 | 67  |
| Cell part                                          | 4634 | 65  |
| Membrane                                           | 3476 | 118 |
| Organelle                                          | 3079 | 38  |
| Membrane part                                      | 2571 | 101 |
| Macromolecular complex                             | 2118 | 22  |
| Organelle part                                     | 1699 | 24  |
| Membrane-enclosed lumen                            | 354  | 4   |
| Extracellular region                               | 206  | 17  |
| Extracellular region part                          | 87   | 8   |
| Virion                                             | 64   | 0   |
| Virion part                                        | 64   | 0   |
| Synapse                                            | 40   | 0   |
| Synapse part                                       | 35   | 0   |
| Cell junction                                      | 32   | 1   |
| <b>Molecular Function</b>                          |      |     |
| Catalytic activity                                 | 6031 | 155 |
| Binding                                            | 5788 | 120 |
| Transporter activity                               | 730  | 31  |
| Structural molecule activity                       | 676  | 5   |
| Molecular transducer activity                      | 225  | 7   |
| Signal transducer activity                         | 225  | 7   |
| Nucleic acid binding transcription factor activity | 137  | 5   |
| Electron carrier activity                          | 132  | 3   |
| Antioxidant activity                               | 57   | 1   |
| Transcription factor activity, protein binding     | 46   | 1   |
| Protein tag                                        | 11   | 0   |
| Metallochaperone activity                          | 4    | 0   |
| Nutrient reservoir activity                        | 3    | 2   |
| Chemoattractant activity                           | 2    | 0   |
| Molecular function regulator                       | 1    | 0   |

**Table S4.** Classification of the Unigenes Annotated in KOG.

| Class Name                                      | Abbreviations | Numbers | Percentage |
|-------------------------------------------------|---------------|---------|------------|
| Translation, ribosomal structure and biogenesis | J             | 13      | 6.10       |
| RNA processing and modification                 | A             | 1       | 0.47       |
| Transcription                                   | K             | 2       | 0.94       |
| Replication, recombination and repair           | L             | 3       | 1.41       |

|                                                               |   |    |       |
|---------------------------------------------------------------|---|----|-------|
| Chromatin structure and dynamics                              | B | 0  | 0     |
| Cell cycle control, cell division, chromosome partitioning    | D | 0  | 0     |
| Nuclear structure                                             | Y | 0  | 0     |
| Defense mechanisms                                            | V | 10 | 4.70  |
| Signal transduction mechanisms                                | T | 13 | 6.10  |
| Cell wall/membrane/envelope biogenesis                        | M | 8  | 3.76  |
| Cell motility                                                 | N | 0  | 0     |
| Cytoskeleton                                                  | Z | 0  | 0     |
| Extracellular structures                                      | W | 0  | 0     |
| Intracellular trafficking, secretion, and vesicular transport | U | 3  | 1.41  |
| Posttranslational modification, protein turnover, chaperones  | O | 29 | 13.6  |
| Energy production and conversion                              | C | 14 | 6.57  |
| Carbohydrate transport and metabolism                         | G | 26 | 12.21 |
| Amino acid transport and metabolism                           | E | 11 | 5.16  |
| Nucleotide transport and metabolism                           | F | 5  | 2.35  |
| Coenzyme transport and metabolism                             | H | 7  | 3.29  |
| Lipid transport and metabolism                                | I | 16 | 7.51  |
| Inorganic ion transport and metabolism                        | P | 9  | 4.23  |
| Secondary metabolites biosynthesis, transport and catabolism  | Q | 13 | 6.10  |
| General function prediction only                              | R | 23 | 10.80 |
| Function unknown                                              | S | 3  | 1.41  |
| Mobilome: prophages, transposons                              | X | 4  | 1.88  |

Footnote: Functional classification of unigenes are classified from A-Z
